# Supplementary material
Source: PubMed Central journal article supplement (PMC6441628)
Supplement: NIHMS1522866-supplement-3.pdf [file NIHMS1522866-supplement-3.pdf]

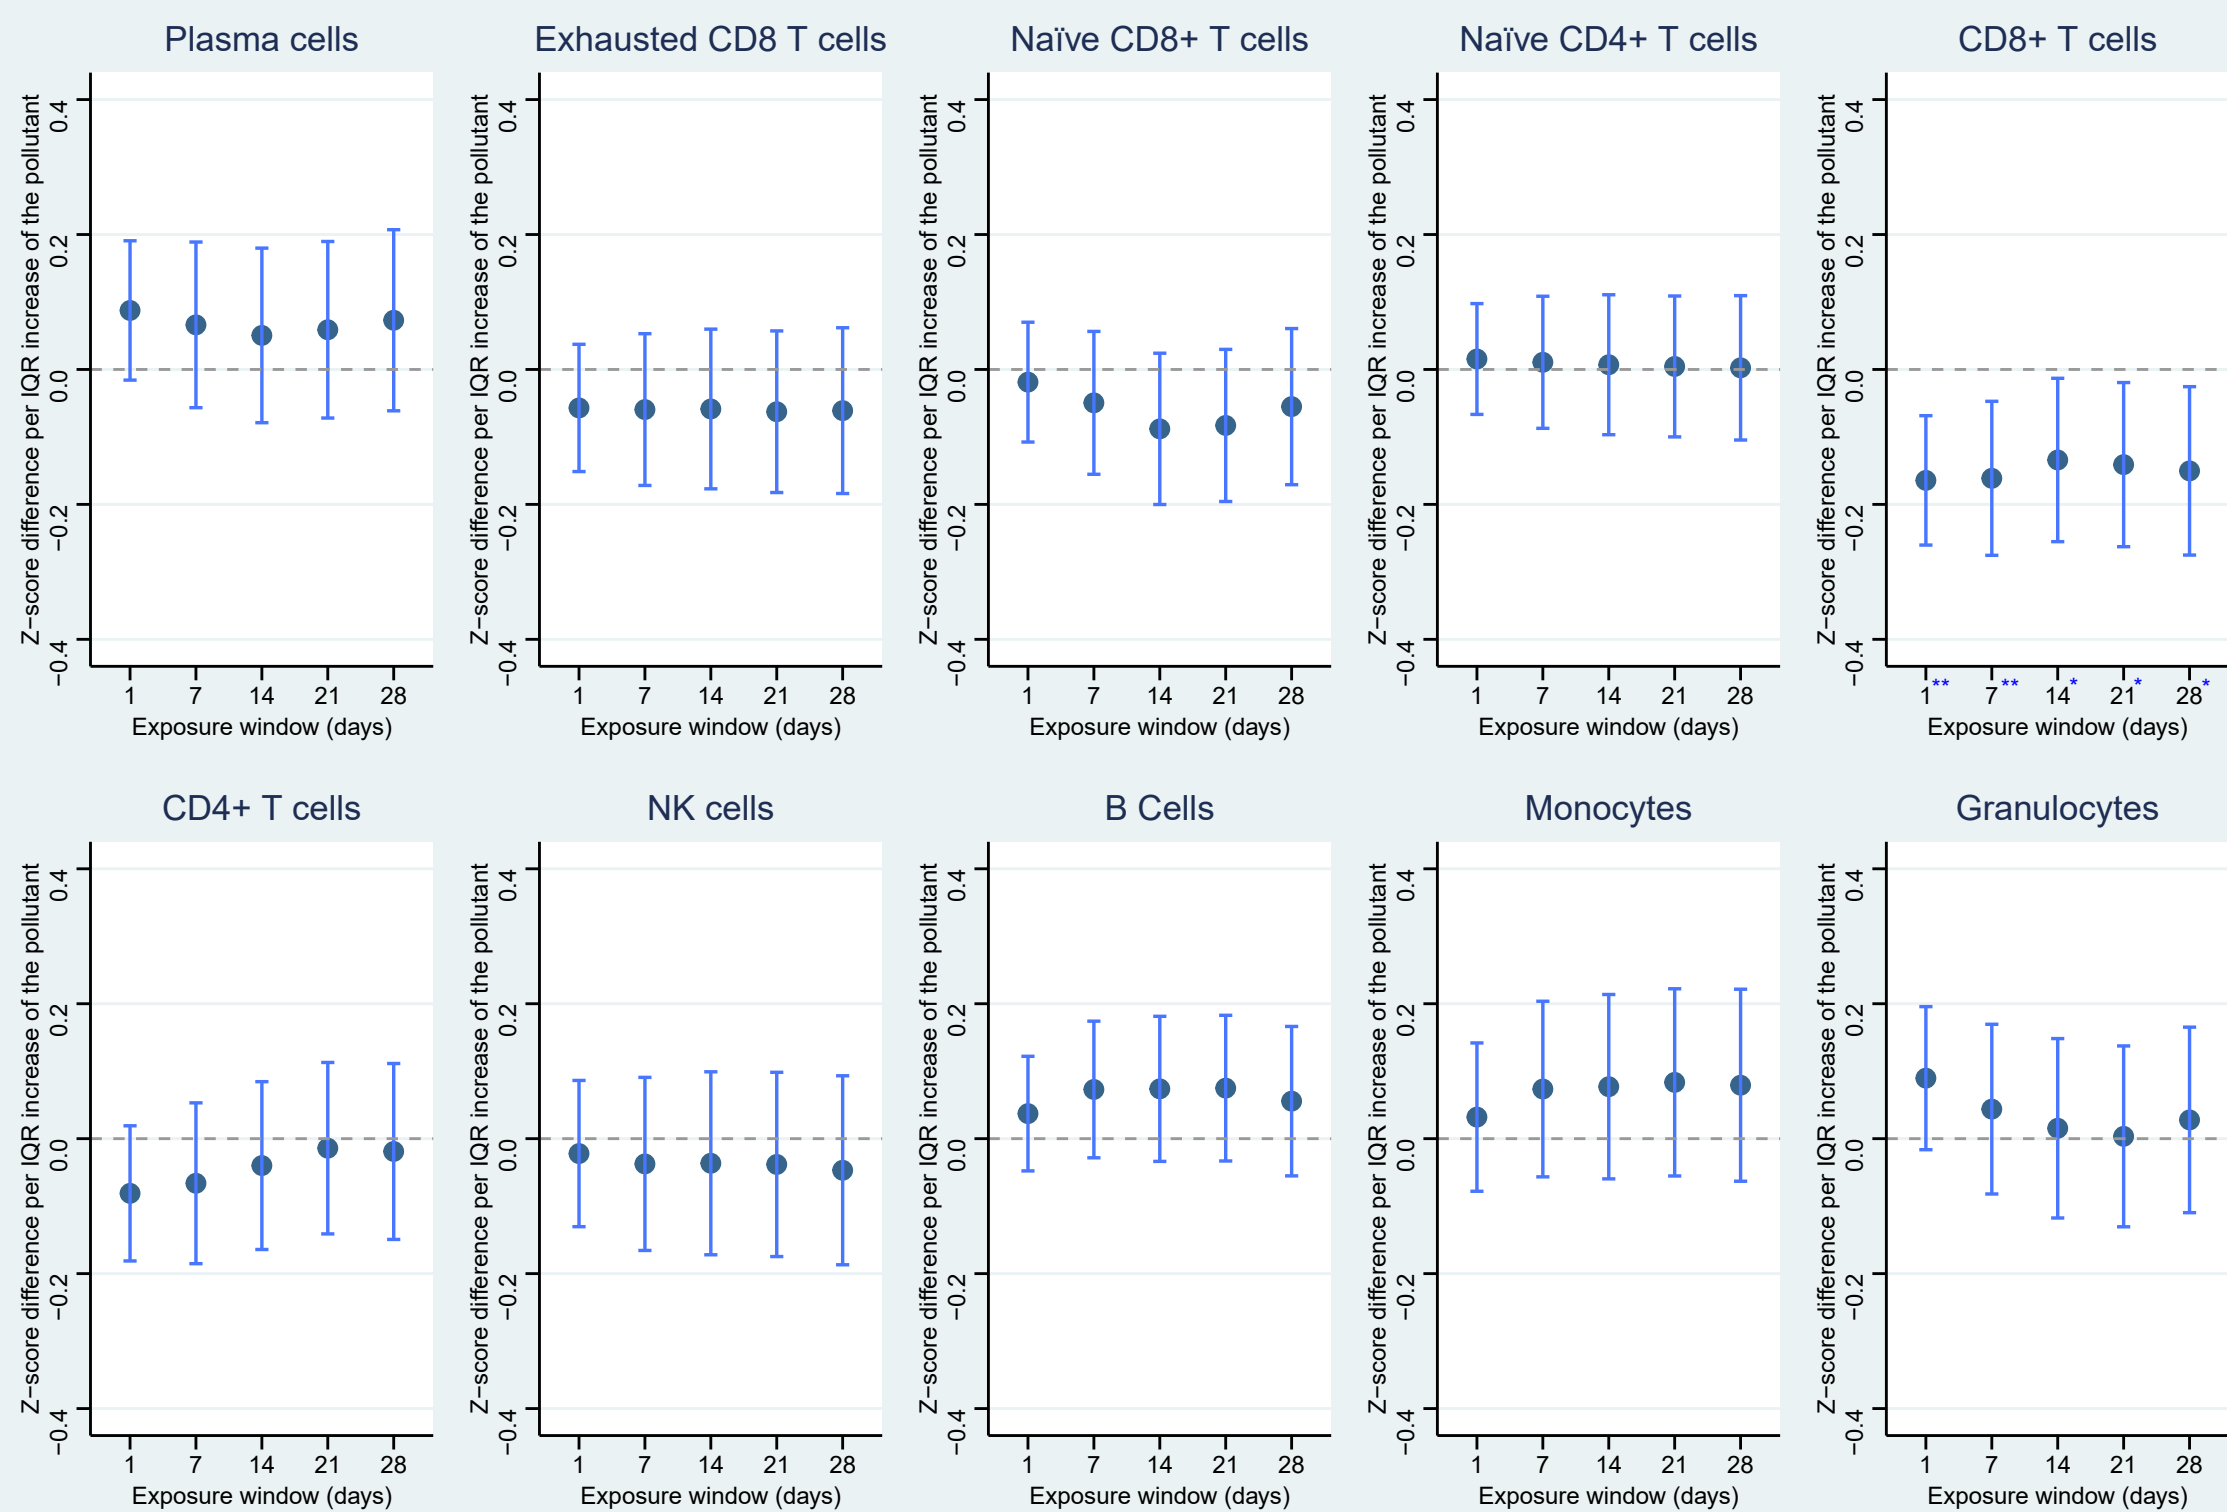

**Figure S3** Associations between temperature and leukocyte distribution in the 28-day exposure window
