# Supplementary material
Source: PubMed Central journal article supplement (PMC6441628)
Supplement: NIHMS1522866-supplement-4.pdf [file NIHMS1522866-supplement-4.pdf]

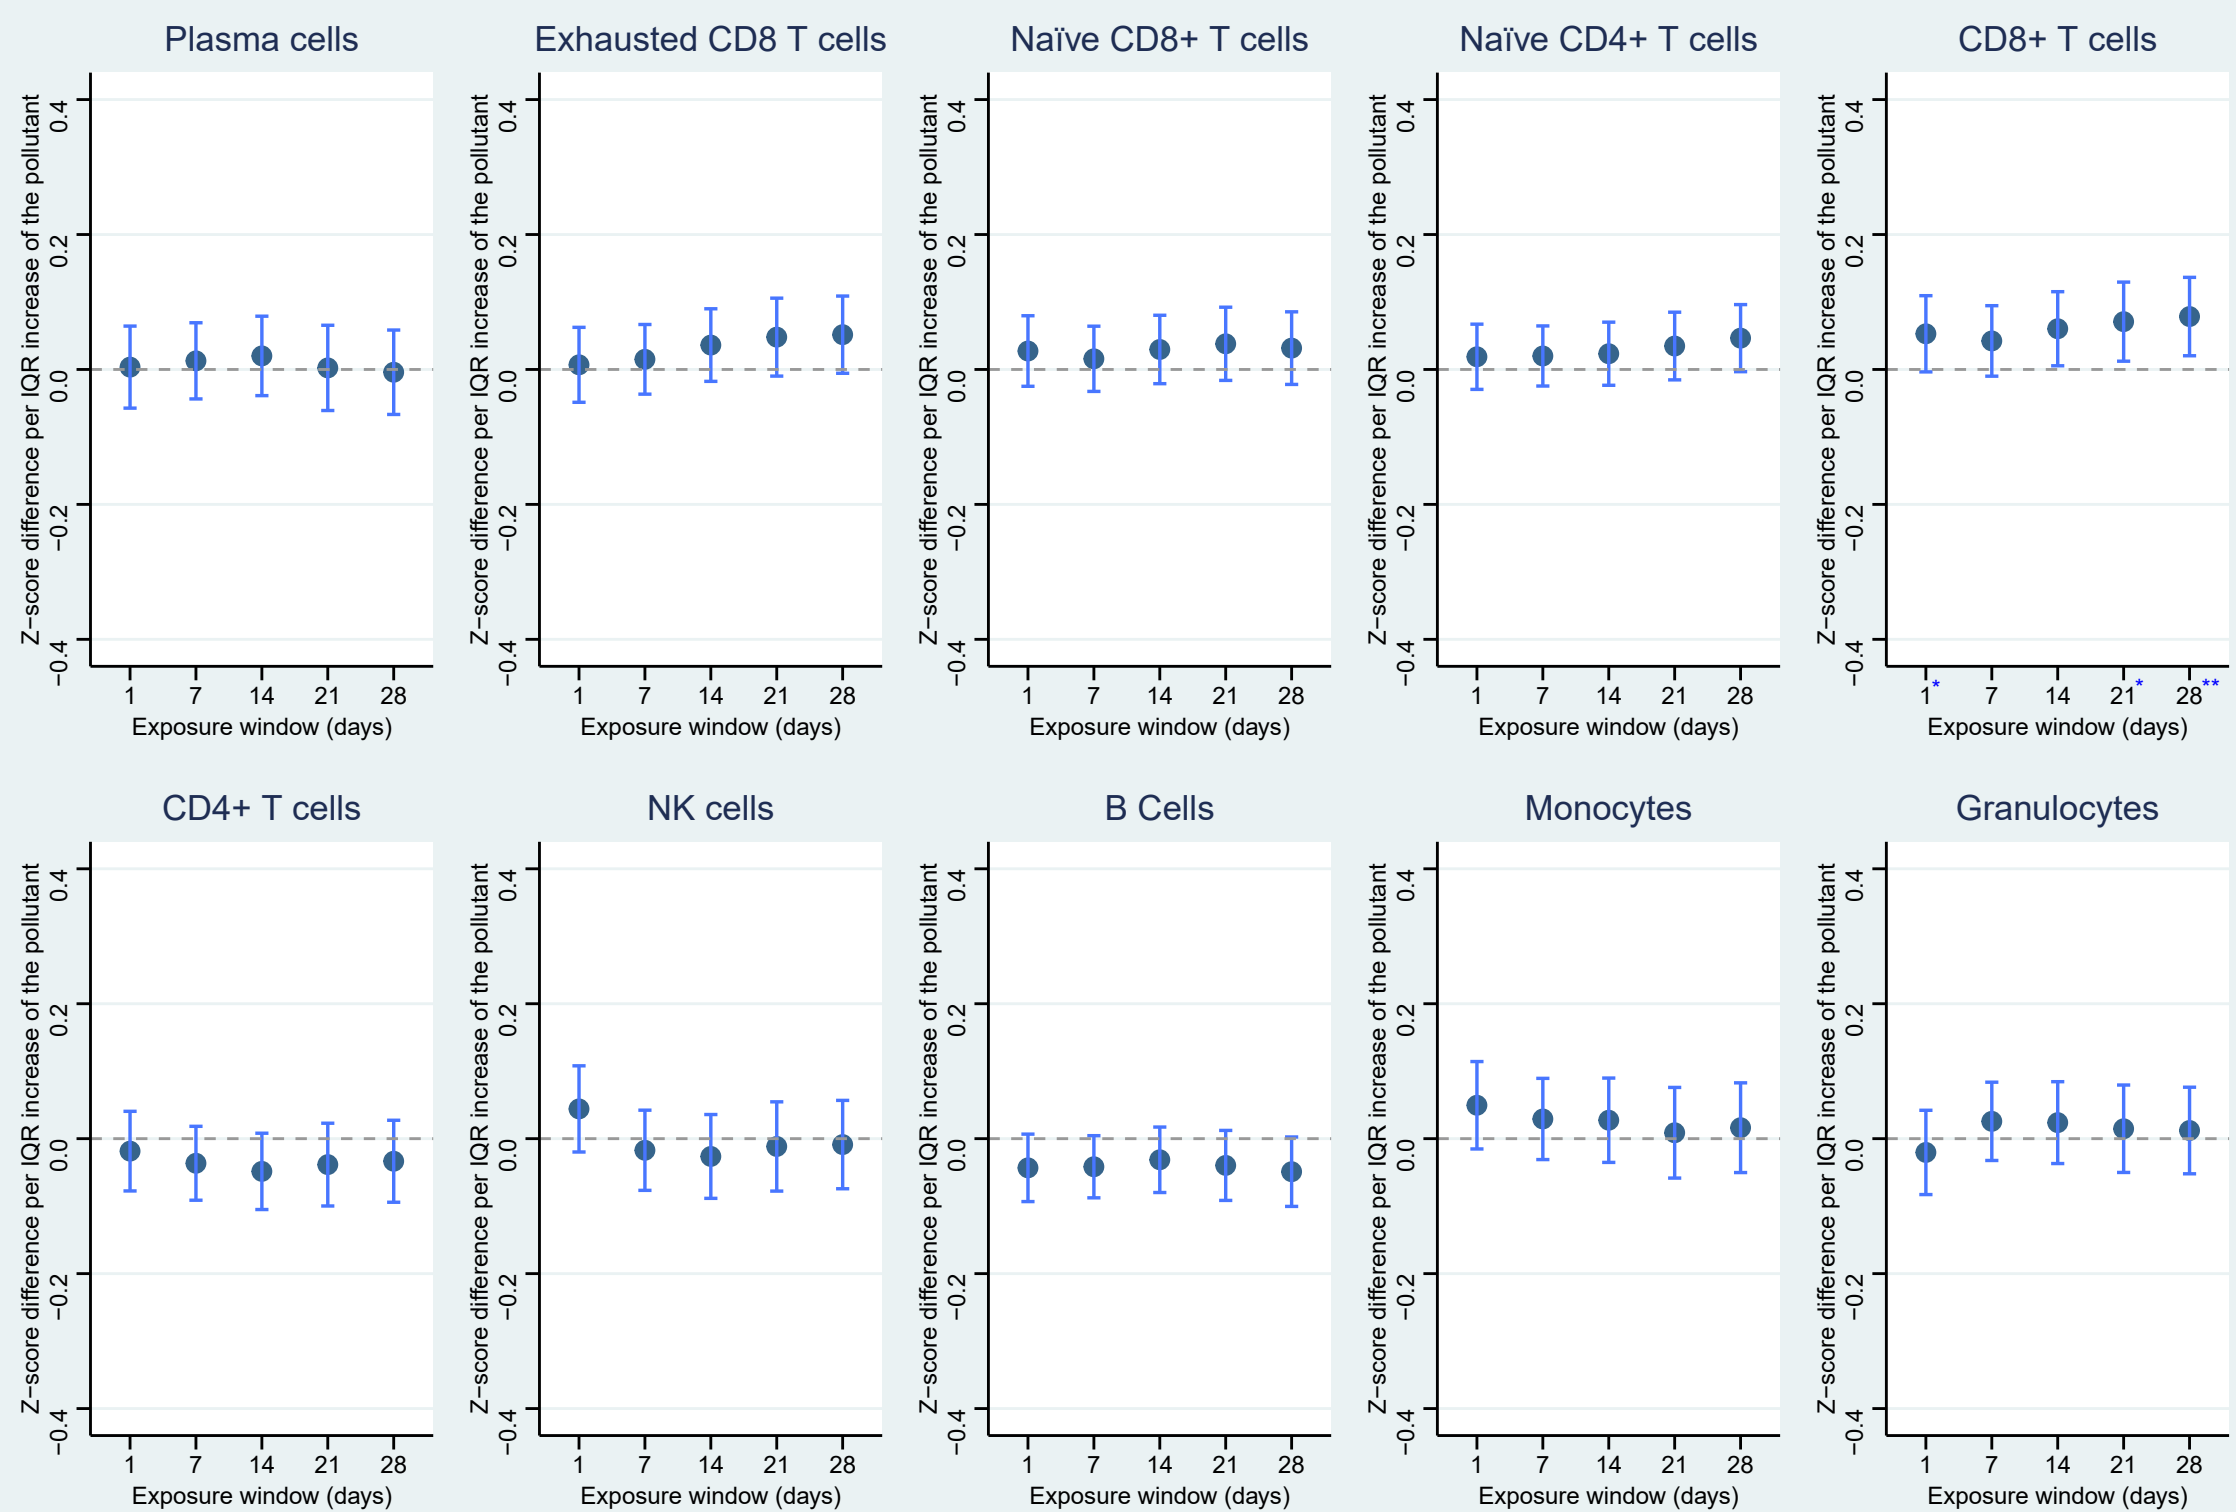

**Figure S4** Associations between relative humidity and leukocyte distribution in the 28-day exposure window
