# Supplementary material
Source: PubMed Central journal article supplement (PMC6441628)
Supplement: NIHMS1522866-supplement-6.pdf [file NIHMS1522866-supplement-6.pdf]

CD8+ T cells

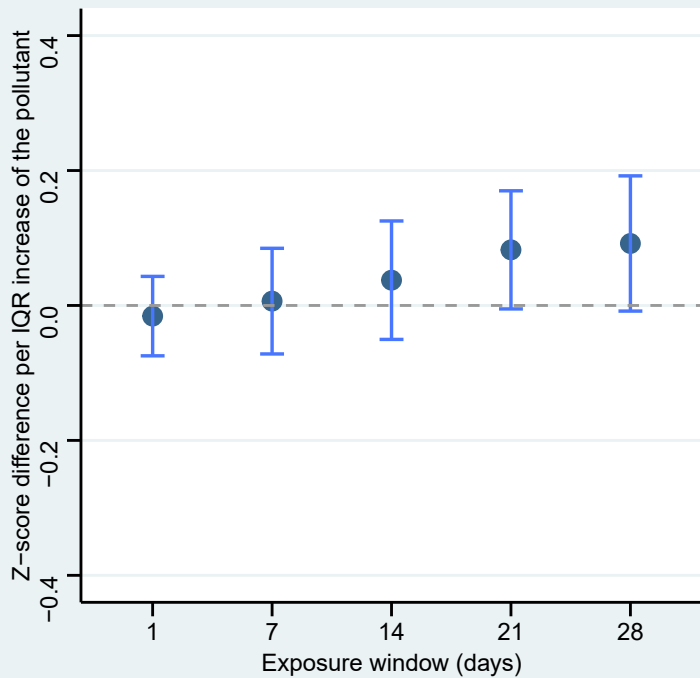

CD4+ T cells

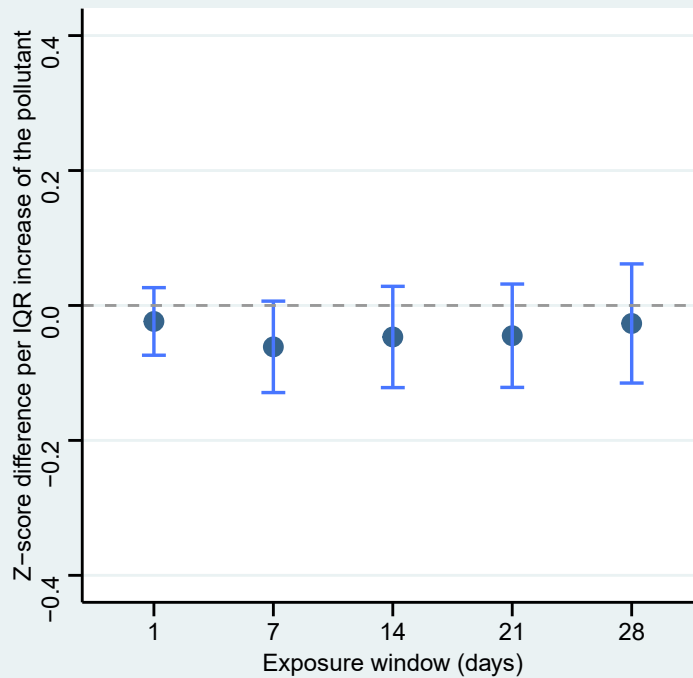

NK cells

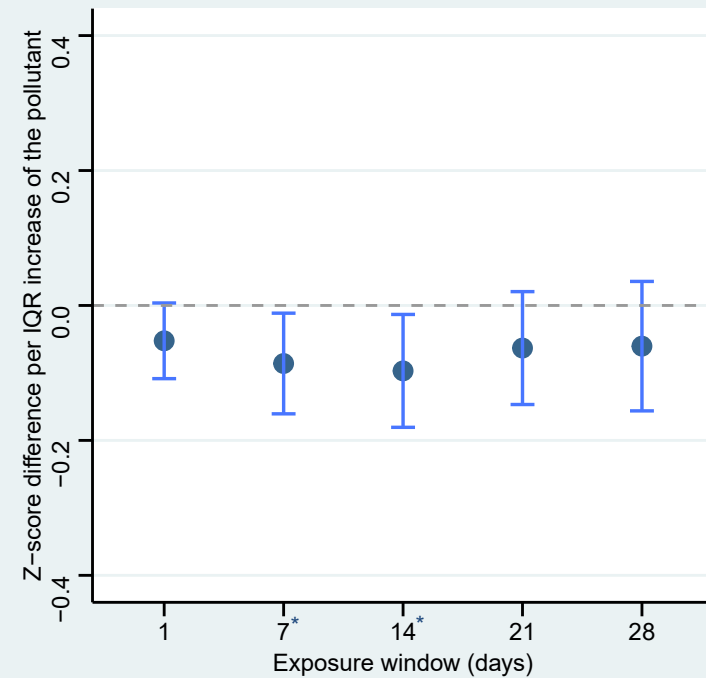

B Cells

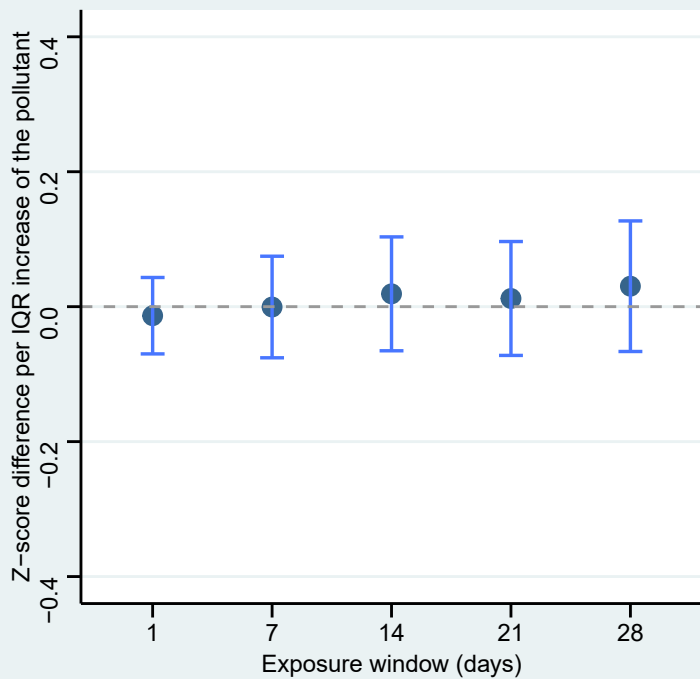

Monocytes

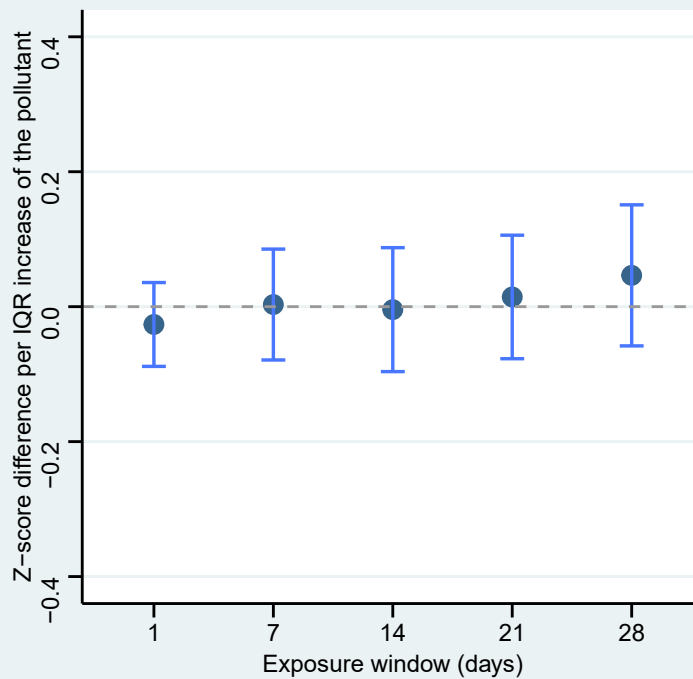

Granulocytes

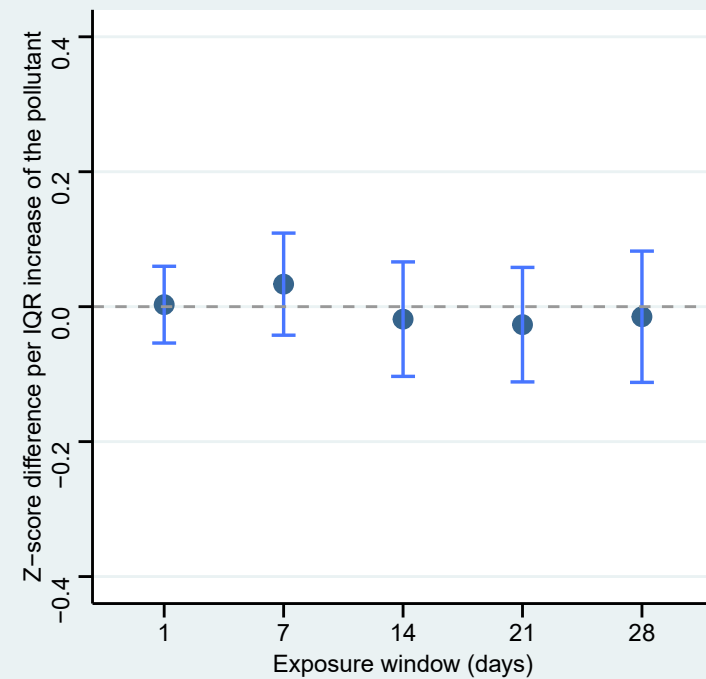

**Figure S6** Associations between BC and leukocyte cell counts (Houseman's algorithm) in the 28-day exposure window
