# Supplementary material
Source: PubMed Central journal article supplement (PMC6441628)
Supplement: NIHMS1522866-supplement-9.pdf [file NIHMS1522866-supplement-9.pdf]

CD8+ T cells

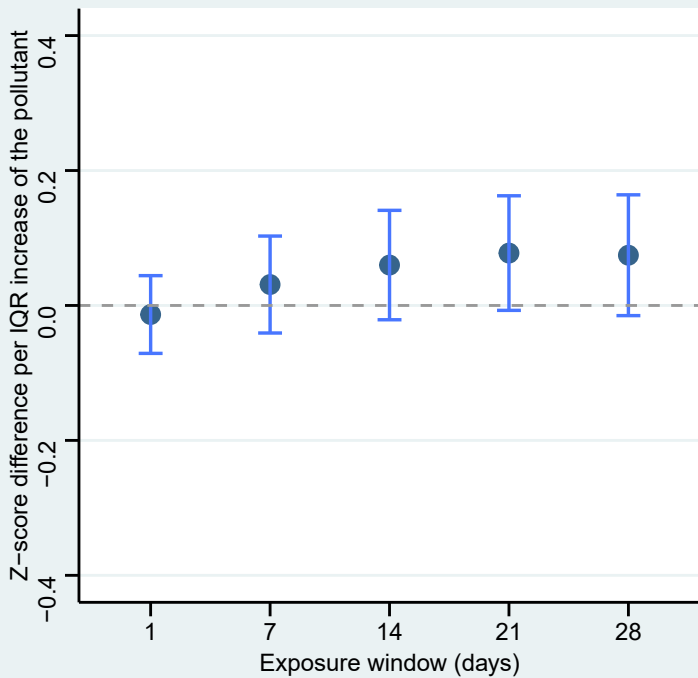

CD4+ T cells

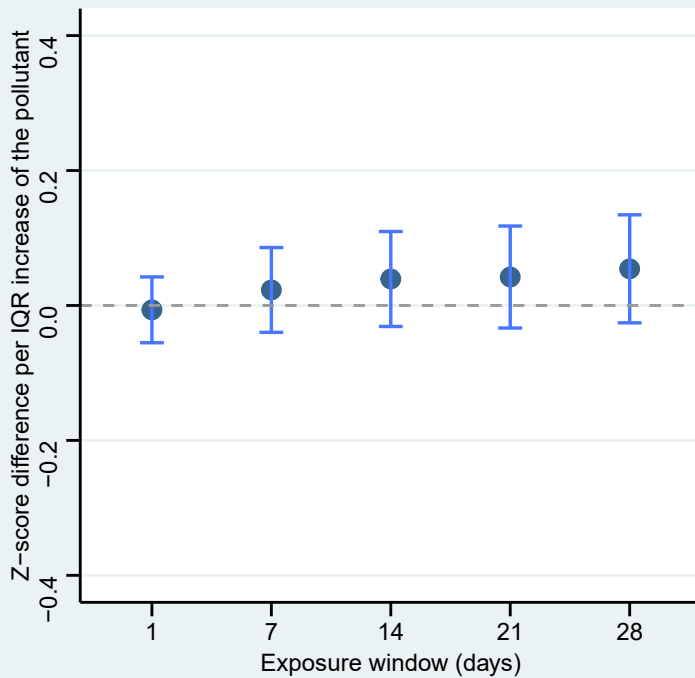

NK cells

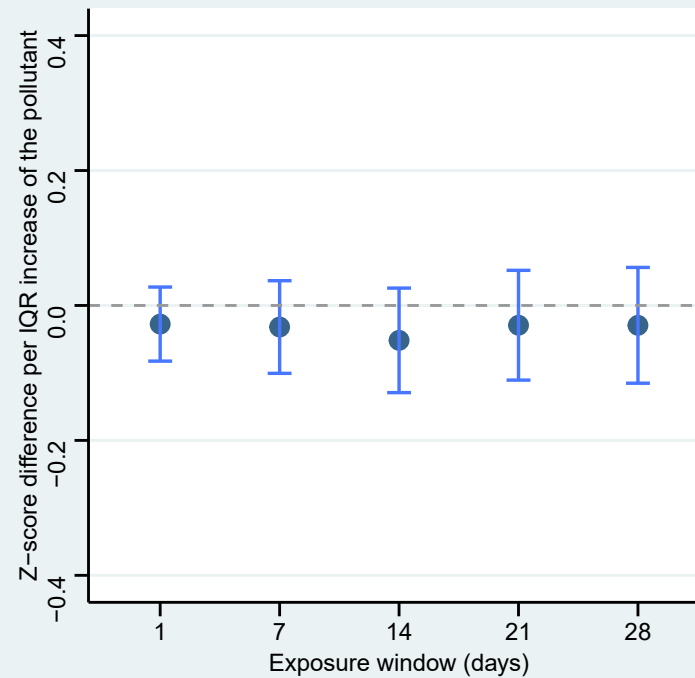

B Cells

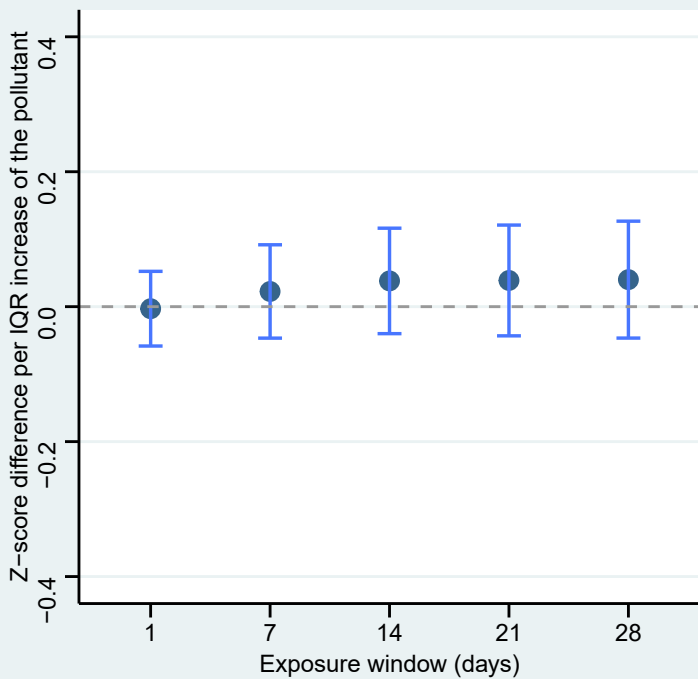

Monocytes

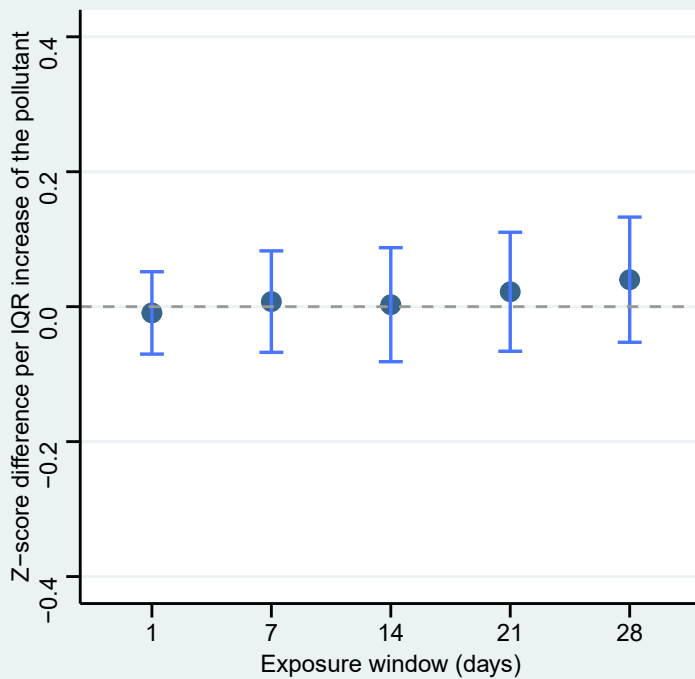

Granulocytes

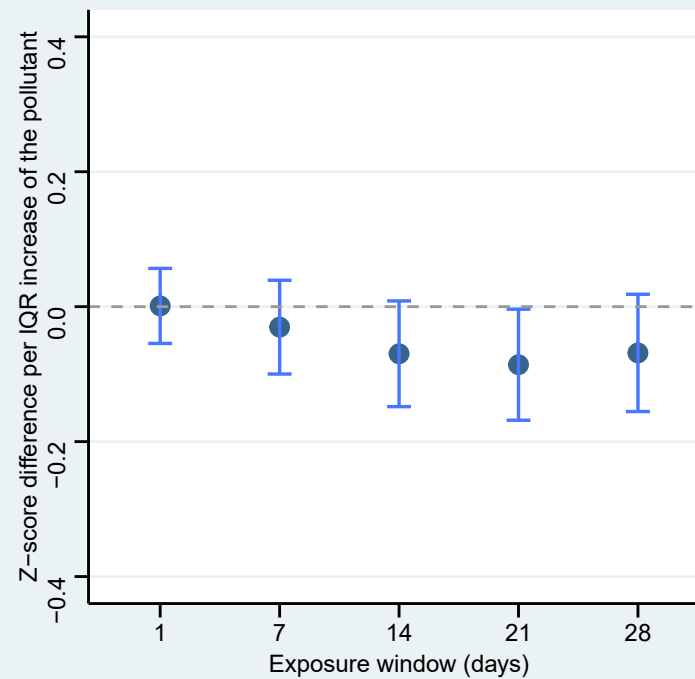**Figure S9** Associations between NO<sub>2</sub> and leukocyte cell counts (Houseman's algorithm) in the 28-day exposure window
