# Supplementary material
Source: PubMed Central journal article supplement (PMC6441628)

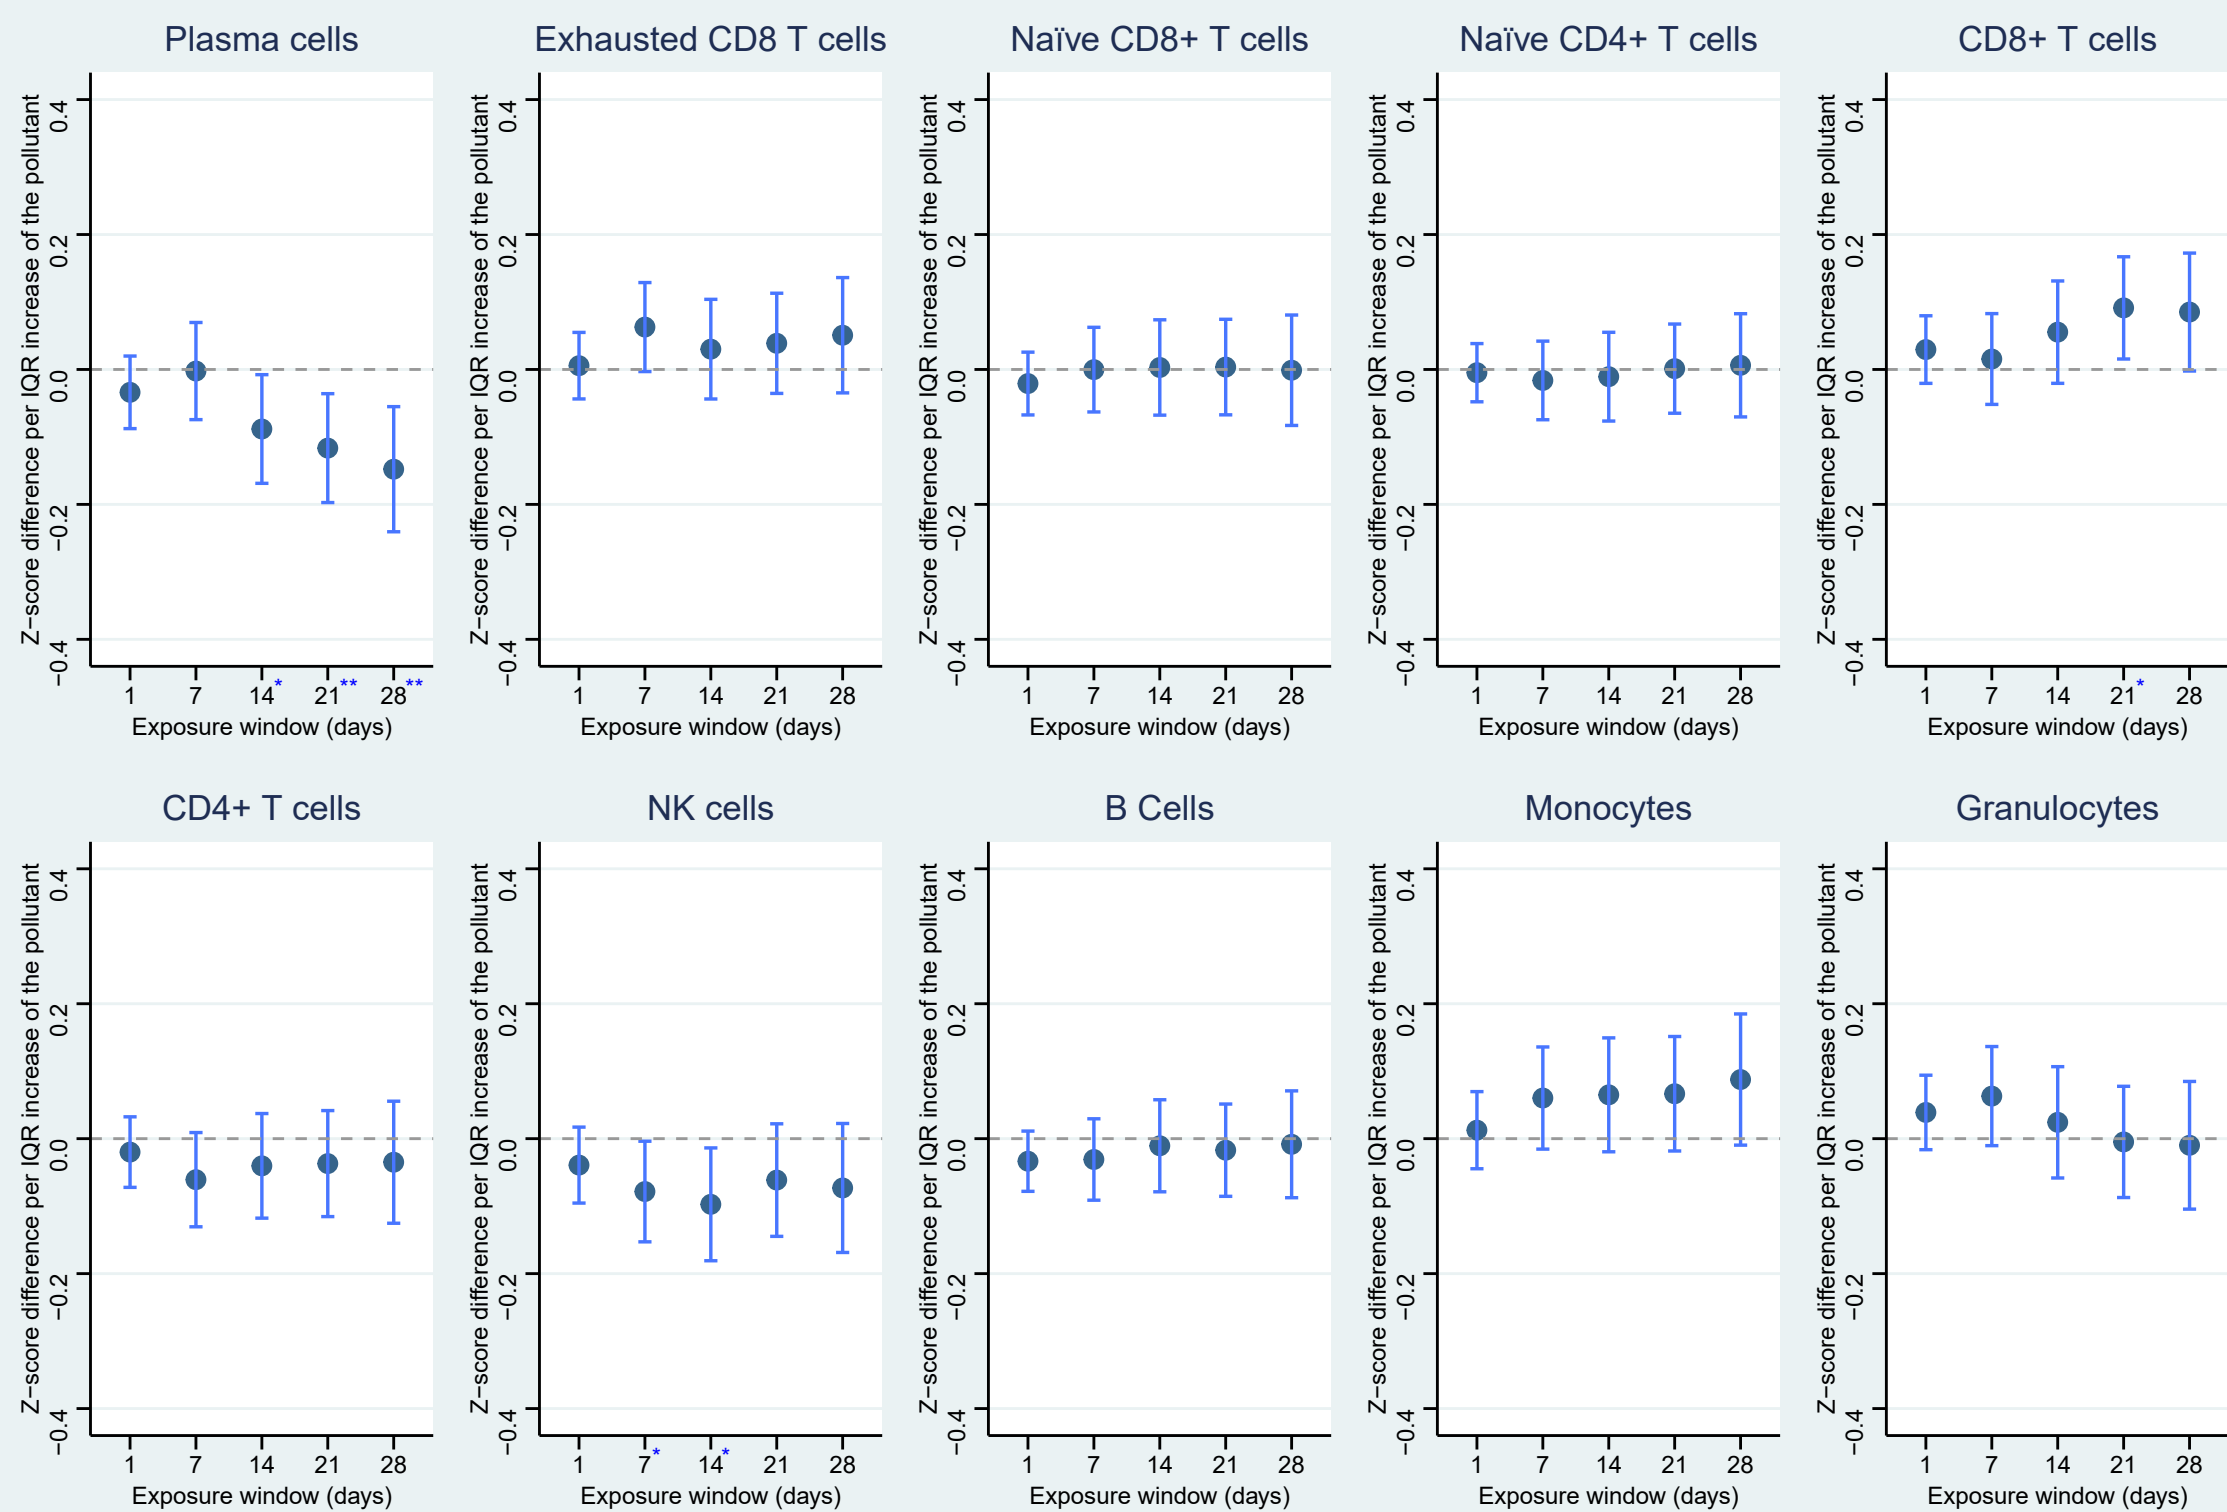

**Figure S1** Associations between BC and leukocyte distribution in the 28-day exposure window

Supplement: NIHMS1522866-supplement-1.pdf [file NIHMS1522866-supplement-1.pdf]

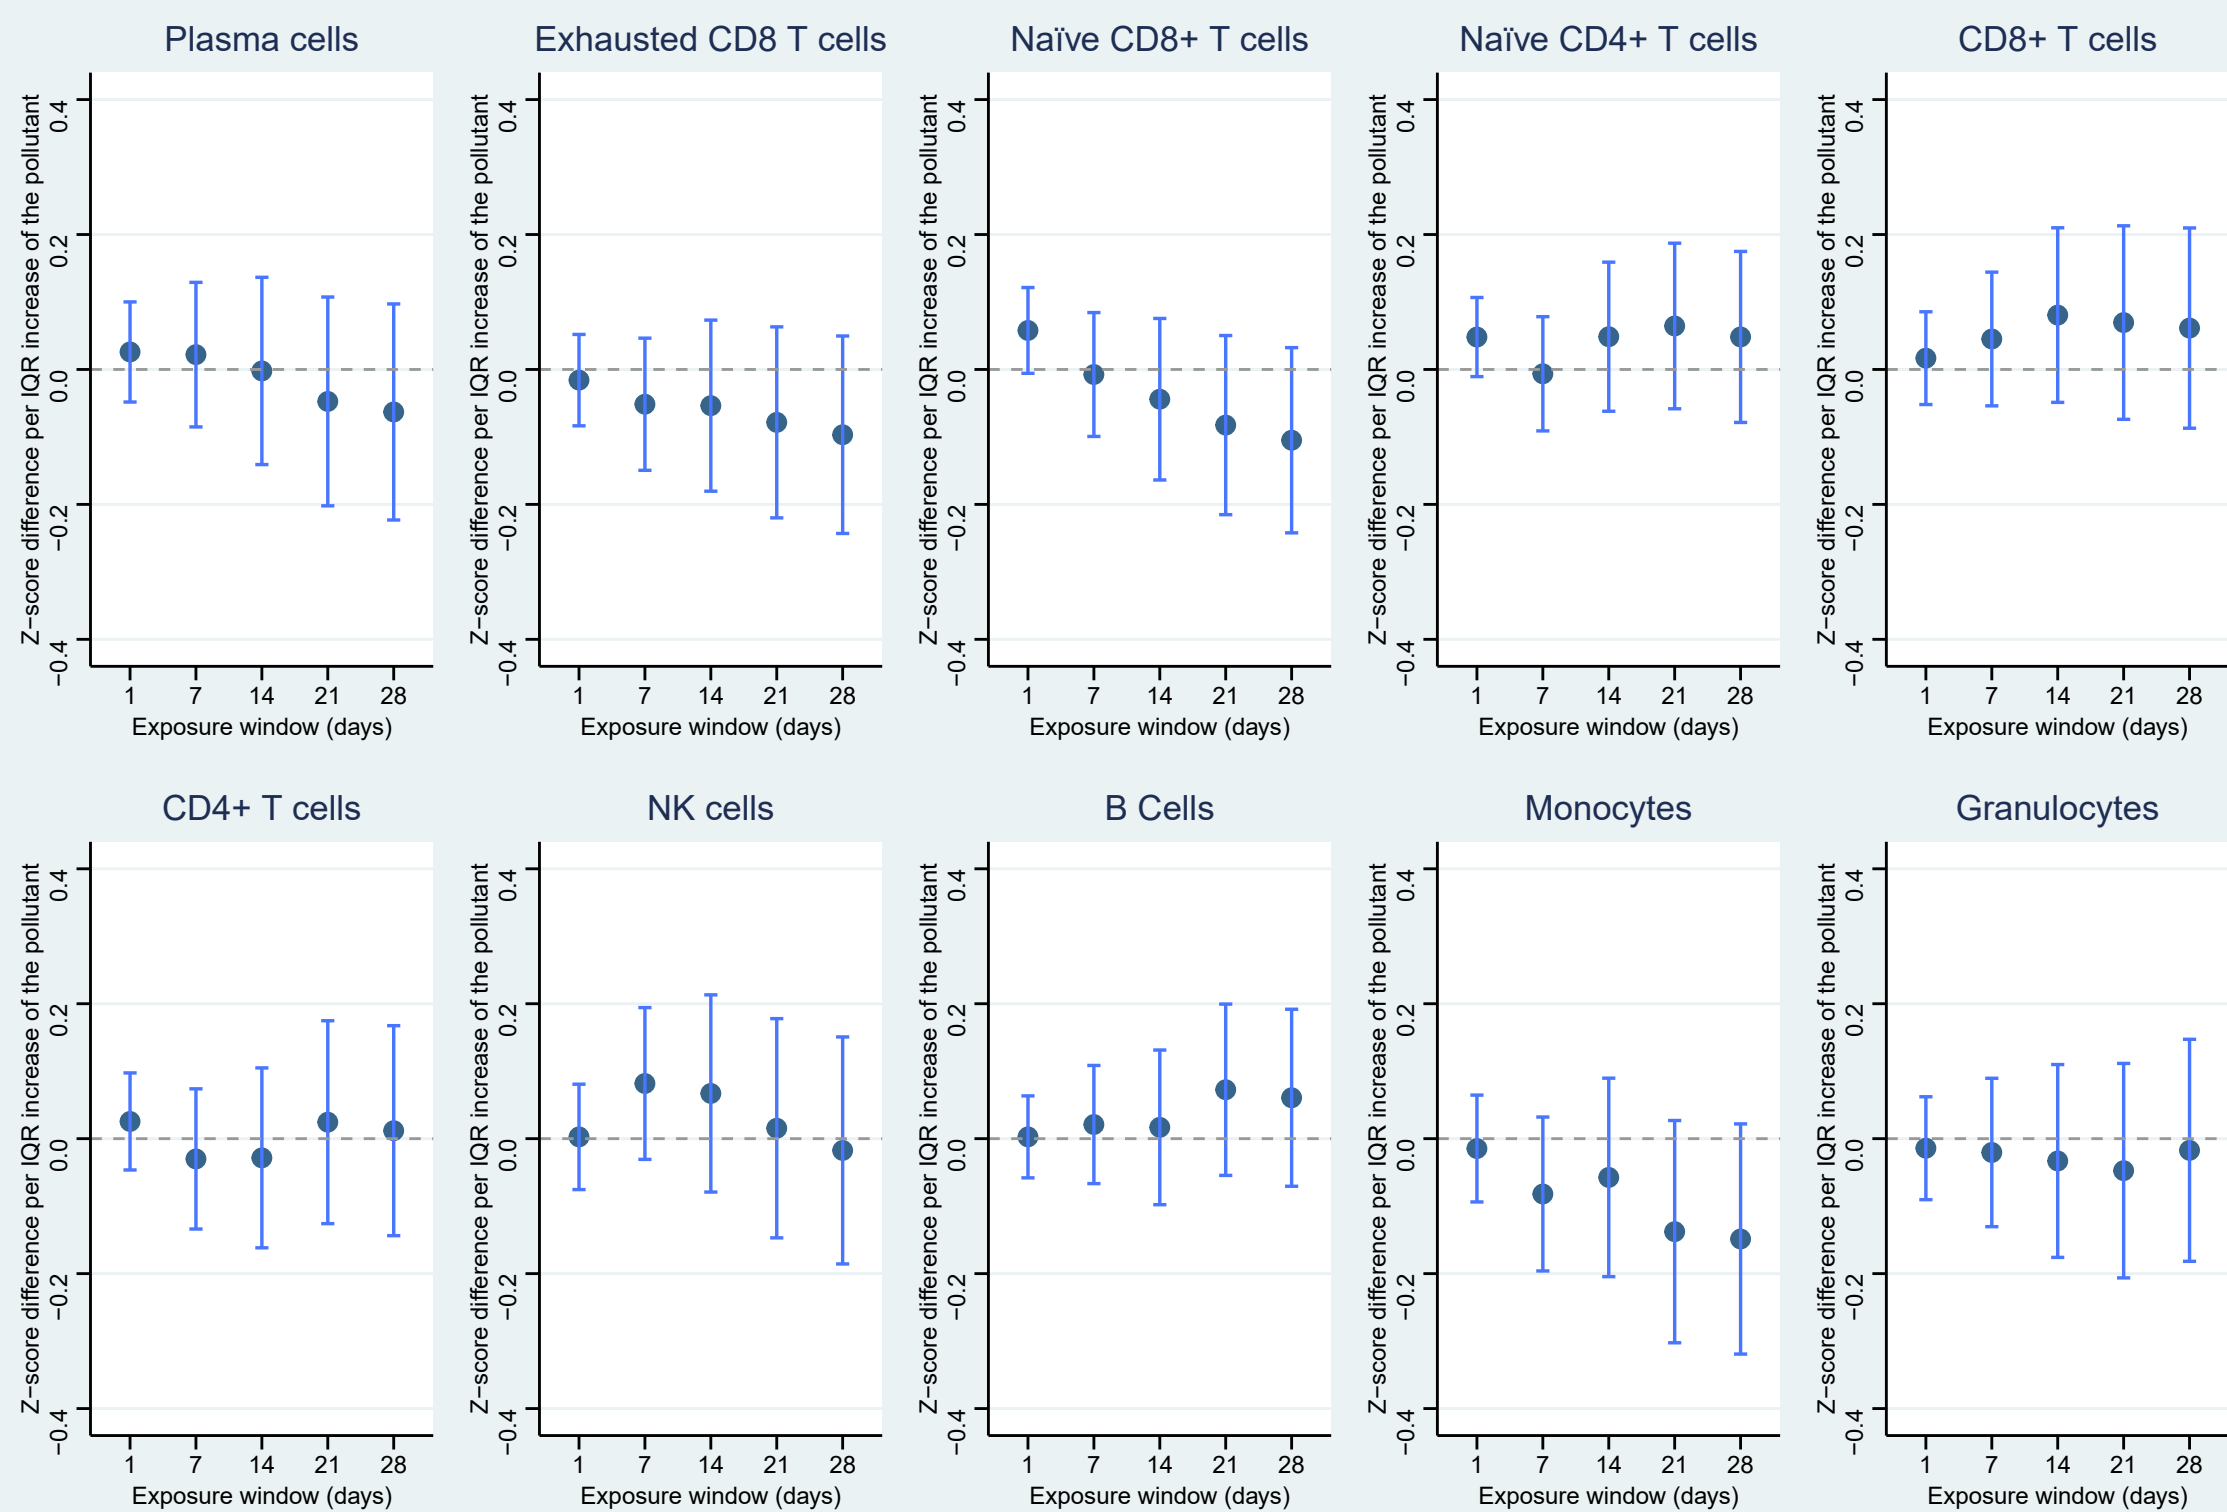

**Figure S2** Associations between O<sub>3</sub> and leukocyte distribution in the 28-day exposure window

Supplement: NIHMS1522866-supplement-2.pdf [file NIHMS1522866-supplement-2.pdf]
